# Supplementary material for: The reduction of astrocytes and brain volume loss in anorexia nervosa—the impact of starvation and refeeding in a rodent model
Source: PubMed Central journal article supplement (PMC6548775; doi:10.1038/s41398-019-0493-7), 2019-06-04
Supplement: 41398_2019_493_MOESM2_ESM.pdf [file 41398_2019_493_MOESM2_ESM.pdf]

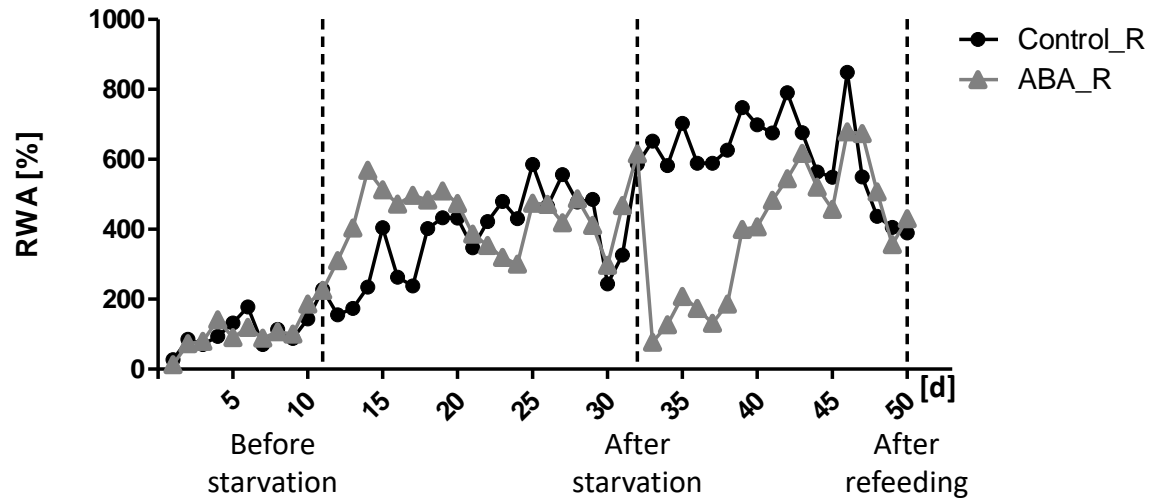

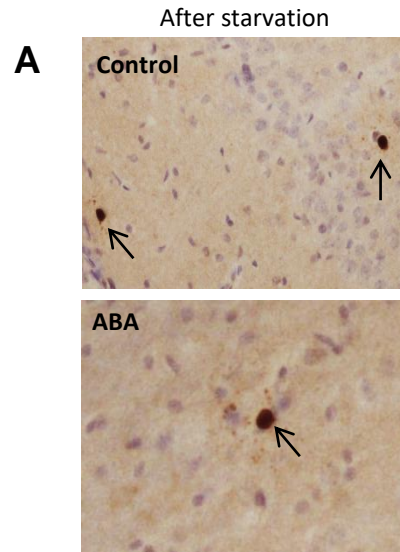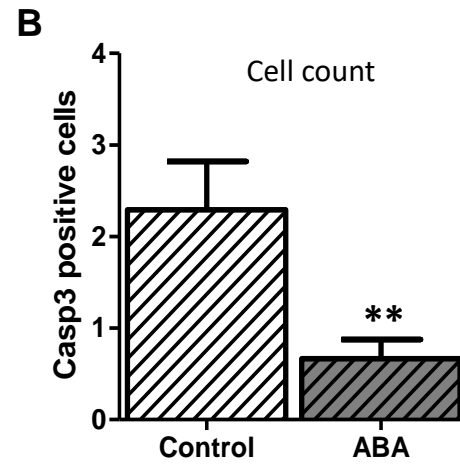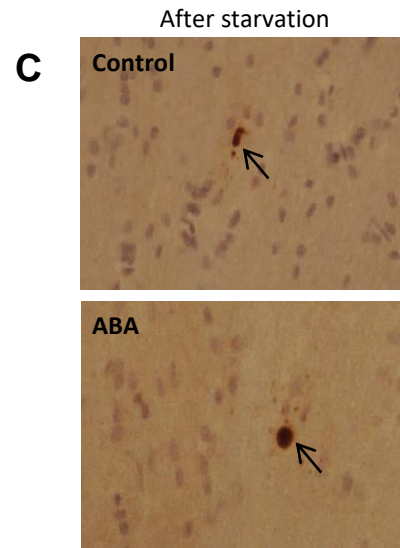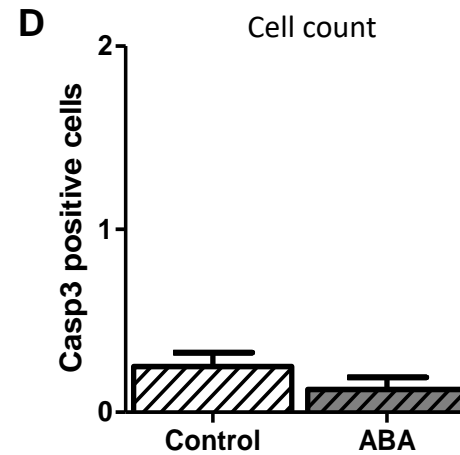

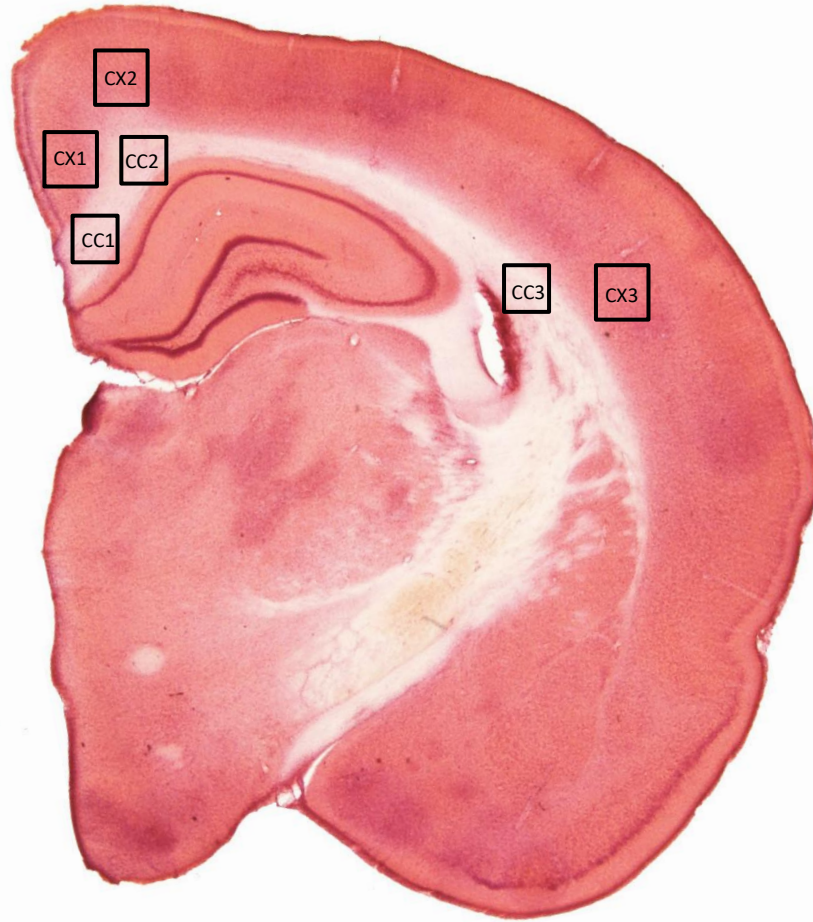

Table 1

| Total brain volume, Analysis Variable : Outcome |                                  |         |       |                         |                 |                |                |
|-------------------------------------------------|----------------------------------|---------|-------|-------------------------|-----------------|----------------|----------------|
|                                                 | Time                             | Group   | N     | Mean (mm <sup>3</sup> ) | SD              |                |                |
| <b>A</b>                                        | Before starvation                | ABA     | 9     | 1467.33                 | 115.47          |                |                |
|                                                 |                                  | Control | 11    | 1485.65                 | 113.00          |                |                |
|                                                 | After starvation                 | ABA     | 11    | 1479.65                 | 94.60           |                |                |
|                                                 |                                  | Control | 12    | 1581.24                 | 114.67          |                |                |
|                                                 | After refeeding                  | ABA     | 11    | 1560.33                 | 69.94           |                |                |
|                                                 |                                  | Control | 12    | 1588.52                 | 57.93           |                |                |
|                                                 | Label                            | df      | t     | p-value                 | Mean difference | CI lower bound | CI upper bound |
| <b>B</b>                                        | ABA vs. control after starvation | 40.7    | -2.54 | 0.02                    | -101.59         | -182.53        | -20.6543       |
|                                                 | ABA vs. control after refeeding  | 40.7    | -0.70 | 0.49                    | -28.1841        | -109.12        | 52.7544        |

Table 2

|          |                                     | Volume Cerebral Cortex (mm <sup>3</sup> ) |         |        |         |         |        |           |           |      |
|----------|-------------------------------------|-------------------------------------------|---------|--------|---------|---------|--------|-----------|-----------|------|
| Time     | Group                               | N                                         | Mean    | SD     | p-value | t (df)  | t      | Cohen's d |           |      |
| A        | After starvation                    | ABA                                       | 11      | 188.98 | 5.07    |         |        |           |           |      |
|          |                                     | Control                                   | 10      | 206.51 | 3.61    | 0.01    | 19     | 2.85      | 1.24      |      |
|          | After refeeding                     | ABA                                       | 10      | 208.45 | 4.56    |         |        |           |           |      |
|          |                                     | Control                                   | 12      | 208.59 | 2.62    | 0.57    | 19     | 0.72      | 0.31      |      |
|          |                                     | Volume Corpus Callosum (mm <sup>3</sup> ) |         |        |         |         |        |           |           |      |
| Time     | Group                               | N                                         | Mean    | SD     | p-value | t (df)  | t      | Cohen's d |           |      |
|          | After starvation                    | ABA                                       | 11      | 22.89  | 0.56    |         |        |           |           |      |
|          |                                     | Control                                   | 7       | 23.58  | 0.69    | 0.08    | 16     | 1.89      | 0.91      |      |
|          | After refeeding                     | ABA                                       | 11      | 22.34  | 0.68    |         |        |           |           |      |
|          |                                     | Control                                   | 12      | 24.93  | 0.71    | 0.02    | 21     | 2.42      | 1.01      |      |
|          |                                     | GFAP Cell Count (cells/mm <sup>2</sup> )  |         |        |         |         |        |           |           |      |
| Variable | Time                                | Group                                     | N       | Mean   | SD      | p-value | t (df) | t         | Cohen's d |      |
| B        | Cerebral Cortex                     | After starvation                          | ABA     | 9      | 5.55    | 3.98    |        |           |           |      |
|          |                                     |                                           | Control | 12     | 22.21   | 11.49   | ≤0.001 | 22        | 4.75      | 1.94 |
|          | After refeeding                     | ABA                                       | 8       | 9.39   | 7.66    |         |        |           |           |      |
|          |                                     | Control                                   | 12      | 7.77   | 4.21    | 0.72    | 21     | -0.36     | 0.15      |      |
|          | Corpus Callosum                     | After starvation                          | ABA     | 12     | 7.24    | 4.56    |        |           |           |      |
|          |                                     |                                           | Control | 12     | 16.36   | 8.62    | ≤0.01  | 22        | 3.24      | 1.32 |
|          | After refeeding                     | ABA                                       | 11      | 7.27   | 3.87    |         |        |           |           |      |
|          |                                     | Control                                   | 12      | 9.09   | 5.77    | 0.39    | 21     | 0.88      | -0.37     |      |
|          |                                     | GFAP Cell surface (positive area, %)      |         |        |         |         |        |           |           |      |
| Variable | Time                                | Group                                     | N       | Mean   | SD      | p-value | t (df) | t         | Cohen's d |      |
| C        | Cerebral Cortex                     | After starvation                          | ABA     | 12     | 7.77    | 0.92    |        |           |           |      |
|          |                                     |                                           | Control | 12     | 11.02   | 1.20    | ≤0.001 | 22        | 4.22      | 1.72 |
|          | After refeeding                     | ABA                                       | 11      | 16.84  | 5.44    |         |        |           |           |      |
|          |                                     | Control                                   | 12      | 10.24  | 2.20    | 0.18    | 21     | -0.79     | 0.33      |      |
|          | Corpus Callosum                     | After starvation                          | ABA     | 12     | 5.77    | 0.57    |        |           |           |      |
|          |                                     |                                           | Control | 12     | 8.50    | 0.67    | ≤0.01  | 22        | 3.14      | 1.28 |
|          | After refeeding                     | ABA                                       | 11      | 12.53  | 5.51    |         |        |           |           |      |
|          |                                     | Control                                   | 12      | 7.79   | 2.32    | 0.11    | 21     | -0.82     | 0.34      |      |
|          |                                     | GFAP mRNA expression                      |         |        |         |         |        |           |           |      |
| Variable | Time                                | Group                                     | N       | Mean   | SD      | p-value | t (df) | t         | Cohen's d |      |
| D        | Cerebral Cortex                     | After starvation                          | ABA     | 12     | 0.64    | 0.22    |        |           |           |      |
|          |                                     |                                           | Control | 12     | 1.00    | 0.21    | ≤0.001 | 22        | 4.59      | 1.87 |
|          | After refeeding                     | ABA                                       | 10      | 0.95   | 0.36    |         |        |           |           |      |
|          |                                     | Control                                   | 12      | 1.00   | 0.37    | 0.77    | 20     | 0.29      | -0.13     |      |
|          | Corpus Callosum                     | After starvation                          | ABA     | 10     | 0.40    | 0.08    |        |           |           |      |
|          |                                     |                                           | Control | 12     | 1.00    | 0.34    | ≤0.001 | 22        | 4.68      | 1.91 |
|          | After refeeding                     | ABA                                       | 7       | 0.94   | 0.37    |         |        |           |           |      |
|          |                                     | Control                                   | 7       | 1.00   | 0.35    | 0.69    | 15     | -0.4      | 0.2       |      |
|          |                                     | Ki67 Cerebral Cortex                      |         |        |         |         |        |           |           |      |
| Variable | Time                                | Group                                     | N       | Mean   | SD      | p-value | t (df) | t         | Cohen's d |      |
| E        | Cell count (cells/mm <sup>2</sup> ) | After starvation                          | ABA     | 12     | 2.18    | 2.50    |        |           |           |      |
|          |                                     |                                           | Control | 12     | 5.24    | 2.60    | ≤0.01  | 22        | 2.95      | -1.2 |
|          | After refeeding                     | ABA                                       | 11      | 7.05   | 5.68    |         |        |           |           |      |
|          |                                     | Control                                   | 12      | 6.46   | 5.10    | 0.8     | 21     | 0.26      | 0.11      |      |
|          |                                     | Ki67 Corpus Callosum                      |         |        |         |         |        |           |           |      |
| Variable | Time                                | Group                                     | N       | Mean   | SD      | p-value | t (df) | t         | Cohen's d |      |
|          | Cell count (cells/mm <sup>2</sup> ) | After starvation                          | ABA     | 12     | 15.31   | 9.71    |        |           |           |      |
|          |                                     |                                           | Control | 12     | 32.36   | 17.96   | ≤0.01  | 22        | 2.89      | 1.18 |
|          | After refeeding                     | ABA                                       | 11      | 37.35  | 14.60   |         |        |           |           |      |
|          |                                     | Control                                   | 12      | 30.40  | 13.93   | 0.26    | 21     | -1.17     | 0.49      |      |
|          |                                     | Map2 Cerebral Cortex                      |         |        |         |         |        |           |           |      |
| Variable | Time                                | Group                                     | N       | Mean   | SD      | p-value | t (df) | t         | Cohen's d |      |
| F        | Cell count (cells/mm <sup>2</sup> ) | After starvation                          | ABA     | 12     | 329.22  | 119.56  |        |           |           |      |
|          |                                     |                                           | Control | 12     | 327.53  | 73.27   | 0.97   | 16        | 0.04      | 0.02 |
|          | After refeeding                     | ABA                                       | 11      | 319.61 | 71.89   |         |        |           |           |      |
|          |                                     | Control                                   | 12      | 295.65 | 56.51   | 0.38    | 21     | -0.89     | 0.37      |      |
|          |                                     | Casp3 Cerebral Cortex                     |         |        |         |         |        |           |           |      |
| Variable | Time                                | Group                                     | N       | Mean   | SD      | p-value | t (df) | t         | Cohen's d |      |
| G        | Cell count (cells/mm <sup>2</sup> ) | After starvation                          | ABA     | 12     | 0.67    | 0.74    |        |           |           |      |
|          |                                     | Control                                   | 12      | 2.29   | 1.83    | ≤0.01   | 22     | 2.87      | -1.17     |      |
|          |                                     | Casp3 Corpus Callosum                     |         |        |         |         |        |           |           |      |
| Variable | Time                                | Group                                     | N       | Mean   | SD      | p-value | t (df) | t         | Cohen's d |      |
|          | Cell count (cells/mm <sup>2</sup> ) | After starvation                          | ABA     | 12     | 0.13    | 0.23    |        |           |           |      |
|          |                                     | Control                                   | 12      | 0.25   | 0.26    | 0.22    | 22     | 1.25      | -0.51     |      |
